# Supplementary material for: Synthesis of 3D α-MnMoO4hierarchical architectures for high-performance supercapacitor applications
Source: Royal Society of Chemistry journal article supplement (doi:10.1039/c6ce02051h), 2016-01-01
Supplement: c6ce02051h1.pdf [file c6ce02051h1.pdf]

## Synthesis of Nanoribbon-Based 3D Fan-Like $\alpha$ -MnMoO<sub>4</sub> Hierarchical Architectures for High-Performance Supercapacitor Applications

Longqiang Wang,<sup>‡a</sup> Longfei Yue,<sup>‡a</sup> Xiao Zang,<sup>a</sup> Hongzheng Zhu,<sup>a</sup> Xiangping Hao,<sup>a</sup> Zhe Leng,<sup>\*b</sup> Xiaoling Liu,<sup>a</sup> and Shougang Chen,<sup>\*a</sup>

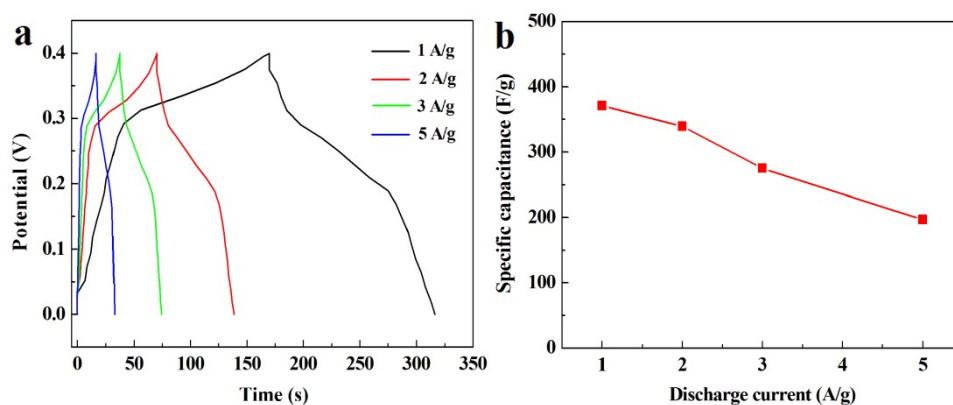

Figure S1. (a) Charge-discharge curves of the  $\alpha$ -MnMoO<sub>4</sub> nanoparticles measured at different current densities; (b) Average specific capacitance of the material at various discharge current densities.

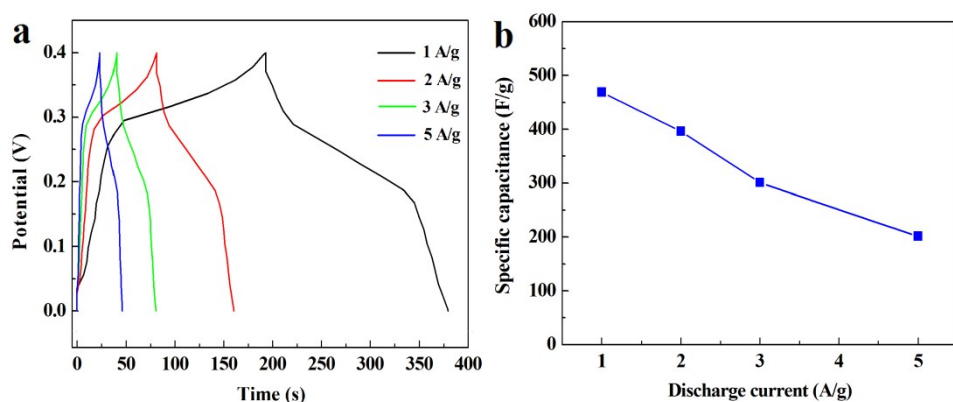

Figure S2. (a) Charge-discharge curves of the  $\alpha$ -MnMoO<sub>4</sub> nanorods measured at different current densities; (b) Average specific capacitance of the material at various discharge current densities.

**Table S1.** Various specific capacitances obtained for the different morphologies of  $\alpha$ -MnMoO<sub>4</sub>, at different scan rates.

| Scan rate (A/g)            | 1   | 2   | 3   | 5   | 10  |
|----------------------------|-----|-----|-----|-----|-----|
| 3D fan-like nanostructures | 562 | 525 | 375 | 332 | 218 |
| Nanoparticles              | 371 | 339 | 275 | 197 |     |
| Nanorods                   | 469 | 396 | 301 | 202 |     |
